# Supplementary material
Source: Springer Nature journal article supplement (https://www.springermedizin.de/resource/supplementary/12943_2009_575_MOESM3_ESM.pdf/9555006)

**A**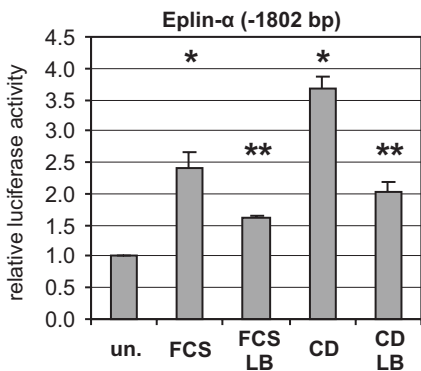**B**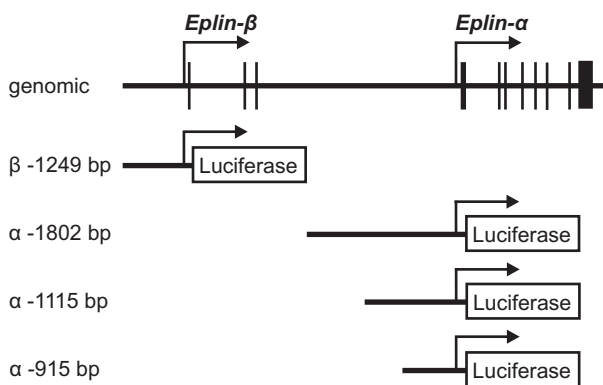**C**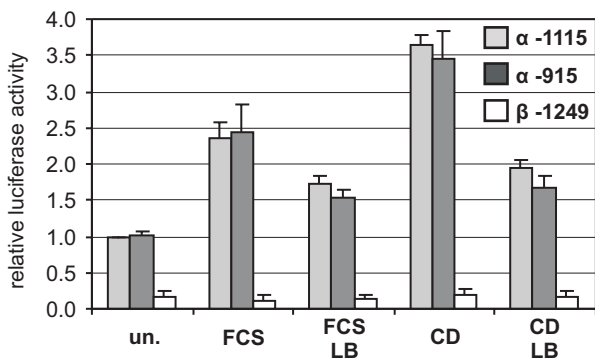**D**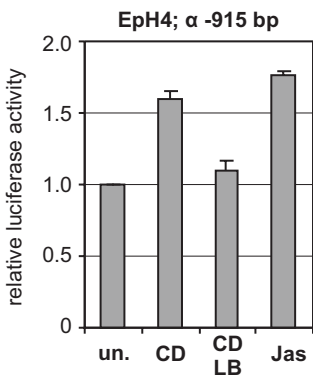

Supplement: MOESM3 [file 9555006]
